# Supplementary material for: A biomimetic receptor for glucose
Source: Springer Nature journal article supplement (doi:10.1038/s41557-018-0155-z), 2018-11-02
Supplement: 41557_2018_155_MOESM19_ESM.mol [file 41557_2018_155_MOESM19_ESM.mol]

nchem.17122675B-comp7.mol
  ChemDraw09101810272D

 24 24  0  0  0  0  0  0  0  0999 V2000
    0.7145   -2.8875    0.0000 C   0  0  0  0  0  0  0  0  0  0  0  0
    0.0000   -2.4750    0.0000 C   0  0  0  0  0  0  0  0  0  0  0  0
    0.0000   -1.6500    0.0000 C   0  0  0  0  0  0  0  0  0  0  0  0
   -0.7145   -1.2375    0.0000 C   0  0  0  0  0  0  0  0  0  0  0  0
   -1.4289   -1.6500    0.0000 C   0  0  0  0  0  0  0  0  0  0  0  0
   -2.1434   -1.2375    0.0000 N   0  0  0  0  0  0  0  0  0  0  0  0
   -2.8579   -1.6500    0.0000 C   0  0  0  0  0  0  0  0  0  0  0  0
   -3.5724   -2.0625    0.0000 O   0  0  0  0  0  0  0  0  0  0  0  0
   -0.7145   -0.4125    0.0000 C   0  0  0  0  0  0  0  0  0  0  0  0
   -1.4289    0.0000    0.0000 C   0  0  0  0  0  0  0  0  0  0  0  0
   -2.1434   -0.4125    0.0000 C   0  0  0  0  0  0  0  0  0  0  0  0
    0.7145   -1.2375    0.0000 C   0  0  0  0  0  0  0  0  0  0  0  0
    1.4289   -1.6500    0.0000 C   0  0  0  0  0  0  0  0  0  0  0  0
    2.1434   -1.2375    0.0000 N   0  0  0  0  0  0  0  0  0  0  0  0
    2.8579   -1.6500    0.0000 C   0  0  0  0  0  0  0  0  0  0  0  0
    3.5724   -2.0625    0.0000 O   0  0  0  0  0  0  0  0  0  0  0  0
    0.7145   -0.4125    0.0000 C   0  0  0  0  0  0  0  0  0  0  0  0
    1.4289    0.0000    0.0000 C   0  0  0  0  0  0  0  0  0  0  0  0
    2.1434   -0.4125    0.0000 C   0  0  0  0  0  0  0  0  0  0  0  0
    0.0000    0.0000    0.0000 C   0  0  0  0  0  0  0  0  0  0  0  0
    0.0000    0.8250    0.0000 C   0  0  0  0  0  0  0  0  0  0  0  0
    0.7145    1.2375    0.0000 N   0  0  0  0  0  0  0  0  0  0  0  0
    0.7145    2.0625    0.0000 C   0  0  0  0  0  0  0  0  0  0  0  0
    0.7145    2.8875    0.0000 O   0  0  0  0  0  0  0  0  0  0  0  0
  1  2  1  0      
  2  3  1  0      
  3  4  1  0      
  4  5  1  0      
  5  6  1  0      
  6  7  2  0      
  7  8  2  0      
  4  9  2  0      
  9 10  1  0      
 10 11  1  0      
  3 12  2  0      
 12 13  1  0      
 13 14  1  0      
 14 15  2  0      
 15 16  2  0      
 12 17  1  0      
 17 18  1  0      
 18 19  1  0      
 17 20  2  0      
  9 20  1  0      
 20 21  1  0      
 21 22  1  0      
 22 23  2  0      
 23 24  2  0      
M  END
